# Supplementary material for: Reaction of GaIIIClPc, SnIVCl2TPP and BIIIClSubPc with cyanide anions: reduction of macrocycles vs. formation of cyano-containing macrocyclic anions
Source: Royal Society of Chemistry journal article supplement (doi:10.1039/d0dt03404e), 2020-01-01
Supplement: d0dt03404e1.pdf [file d0dt03404e1.pdf]

**Reaction of Ga<sup>III</sup>ClPc, Sn<sup>IV</sup>Cl<sub>2</sub>TPP and B<sup>III</sup>ClSubPc with cyanide anions: reduction of macrocycles vs formation of cyano-containing macrocyclic anions.**

Dmitri V. Konarev,<sup>\*a</sup> Alexey V. Kuzmin,<sup>b</sup> Alexander F. Shestakov,<sup>a</sup> Ivan A. Rompanen,<sup>a,c</sup> and  
Rimma N. Lyubovskaya<sup>a</sup>

<sup>a</sup>Institute of Problems of Chemical Physics RAS, Chernogolovka, Moscow region, 142432 Russia;

<sup>b</sup>Institute of Solid State Physics RAS, Chernogolovka, Moscow region, 142432 Russia;

<sup>c</sup>National Research University Higher School of Economics, Faculty of Physics, Moscow, Russia

## SUPPORTING INFORMATION

**Table S1.** IR spectra of starting compounds and salts **1** and **2**.

| Components                                    | Cryptand<br>[2.2.2]                                                                                                                                                                | Ga <sup>III</sup> ClPc                                                                                                                                       | {crypt(K <sup>+</sup> )}<br>{Ga <sup>III</sup> CN(Pc <sup>3-</sup> )} <sup>•-</sup><br>·0.5C <sub>6</sub> H <sub>4</sub> Cl <sub>2</sub> ( <b>1</b> )                       | Sn <sup>IV</sup> Cl <sub>2</sub> TPP                                                                                                                                                                                               | {crypt(K <sup>+</sup> )}<br>{Sn <sup>IV</sup> (CN) <sub>2</sub><br>[TPP(CN) <sup>3-</sup> ]} <sup>-</sup><br>( <b>2</b> )                                                                                                                                                                       |
|-----------------------------------------------|------------------------------------------------------------------------------------------------------------------------------------------------------------------------------------|--------------------------------------------------------------------------------------------------------------------------------------------------------------|-----------------------------------------------------------------------------------------------------------------------------------------------------------------------------|------------------------------------------------------------------------------------------------------------------------------------------------------------------------------------------------------------------------------------|-------------------------------------------------------------------------------------------------------------------------------------------------------------------------------------------------------------------------------------------------------------------------------------------------|
| Metal<br>macrocycle                           |                                                                                                                                                                                    | 430w<br>507w<br>572w<br>733s<br>755m<br>780m<br>897m<br>1062s<br>1121s<br>1169m<br>1288m<br>1332s<br>1423m<br>1467w<br>1484w<br>1506m<br>1608w<br>-<br>3050w | 438w<br>503w<br>570w<br>712s 718s<br>753s*<br>766s<br>892w<br>1054m<br>1118s*<br>1169s<br>1267w<br>1327s*<br>1422s<br>1466s<br>-<br>1512w<br>-<br>CN (2179w)<br>CH (3050w)  | 439w<br>475w<br>534w<br>560w<br>615w<br>660w<br>702s<br>753s<br>802s<br>846w<br>1025s<br>1073s<br>1109w<br>1175w<br>1210m<br>1237w<br>1304w<br>1346w<br>1382w<br>1440m<br>1472m<br>1518w<br>-<br>-<br>-<br>2851w<br>2923w<br>3056w | 438w<br>490w*<br>-<br>550w<br>628w<br>660w<br>704s<br>758s 771m<br>792m<br>844w<br>1015m 1018m<br>1067s<br>1107s*<br>1158w 1177w<br>1205w<br>1240w 1266m<br>1300m*<br>1352w<br>1372m<br>1420s 1440m*<br>1474vs*<br>1540m 1574w<br>1596w<br>CN (2150w)<br>CN (2240w)<br>2884w*<br>2920w<br>3056w |
| Cryptand(M <sup>+</sup> )                     | 476w<br>528w<br>581w<br>735m<br>922m<br>948w<br>982m<br>1038w<br>1071m<br>1100s<br>1127s<br>1213w<br>1295m<br>1329m<br>1360s<br>1446m<br>1462m<br>1490w<br>2790w<br>2877w<br>2943w |                                                                                                                                                              | -<br>-<br>586w<br>735w<br>925m<br>940w<br>999w<br>-<br>1089s<br>1101s<br>1118s*<br>-<br>1292m 1300m<br>1327s*<br>1355m 1381m<br>-<br>1454s*<br>-<br>2820w<br>2868w<br>2960w |                                                                                                                                                                                                                                    | 490w*<br>-<br>-<br>932w<br>951m<br>-<br>1031w<br>-<br>1107s*<br>1135m<br>1223w<br>1300m*<br>1327w<br>1360w<br>1440m<br>1447m<br>1474vs*<br>-<br>2812w<br>2884w*<br>2957w                                                                                                                        |
| C <sub>6</sub> H <sub>4</sub> Cl <sub>2</sub> |                                                                                                                                                                                    |                                                                                                                                                              | 659w<br>753s*<br>-<br>1454s*                                                                                                                                                |                                                                                                                                                                                                                                    |                                                                                                                                                                                                                                                                                                 |

\* - bands coincide; w – weak intensity, m –middle intensity, s – strong intensity

**Table S2.** IR spectra of starting compound and salt **3**.

| Components                                    | B <sup>III</sup> ClSubPc                                                                                                                                                                                                         | {crypt(K <sup>+</sup> )} <sub>2</sub><br>{B <sup>III</sup> (CN)<br>(SubPc(CN) <sub>2</sub> )} <sub>2</sub> <sup>2-</sup><br>·3C <sub>6</sub> H <sub>4</sub> Cl <sub>2</sub> ( <b>3</b> )                                                                                                                                                                                                                                                               |
|-----------------------------------------------|----------------------------------------------------------------------------------------------------------------------------------------------------------------------------------------------------------------------------------|--------------------------------------------------------------------------------------------------------------------------------------------------------------------------------------------------------------------------------------------------------------------------------------------------------------------------------------------------------------------------------------------------------------------------------------------------------|
| Metal macrocycle                              | 444w<br>631w<br>697w<br>750vs<br>758m<br>797w<br>880w<br>951m<br>960m<br>1088w<br>1130s<br>1150w<br>1196w<br>1231m<br>1281s<br>1321w<br>1386m<br>1432s<br>1440s<br>1453s<br>1491w<br>-<br>-<br>-<br>-<br>2853w<br>2925w<br>3058w | 441w<br>-<br>681w<br>740s*<br>750s*<br>772m<br>877w<br>951s*<br>976w*<br>1080s*<br>1132s*<br>-<br>-<br>1259w<br>1283w<br>1324m*<br>1384m<br>-<br>-<br>1456m*<br>1471m*<br>1580m<br>1613s 1640s<br>CN (2130w)<br>CN (2170w)<br>CN(2233w)<br>2885w<br>-<br>3058w<br>-<br>525w<br>-<br>740s*<br>931m<br>951s*<br>976w*<br>1032w*<br>1080s*<br>1102vs<br>1132s*<br>-<br>1300w<br>1324m*<br>1355s 1360s<br>-<br>1456m*<br>1471m*<br>2815w<br>2886w<br>2950w |
| Cryptand(K <sup>+</sup> )                     |                                                                                                                                                                                                                                  |                                                                                                                                                                                                                                                                                                                                                                                                                                                        |
| C <sub>6</sub> H <sub>4</sub> Cl <sub>2</sub> |                                                                                                                                                                                                                                  | 658w<br>750s*<br>1032w*<br>1456m*                                                                                                                                                                                                                                                                                                                                                                                                                      |

\* - bands coincide, w – weak intensity, m –middle intensity, s – strong intensity

IR spectra of starting metal phthalocyanines and obtained salts.

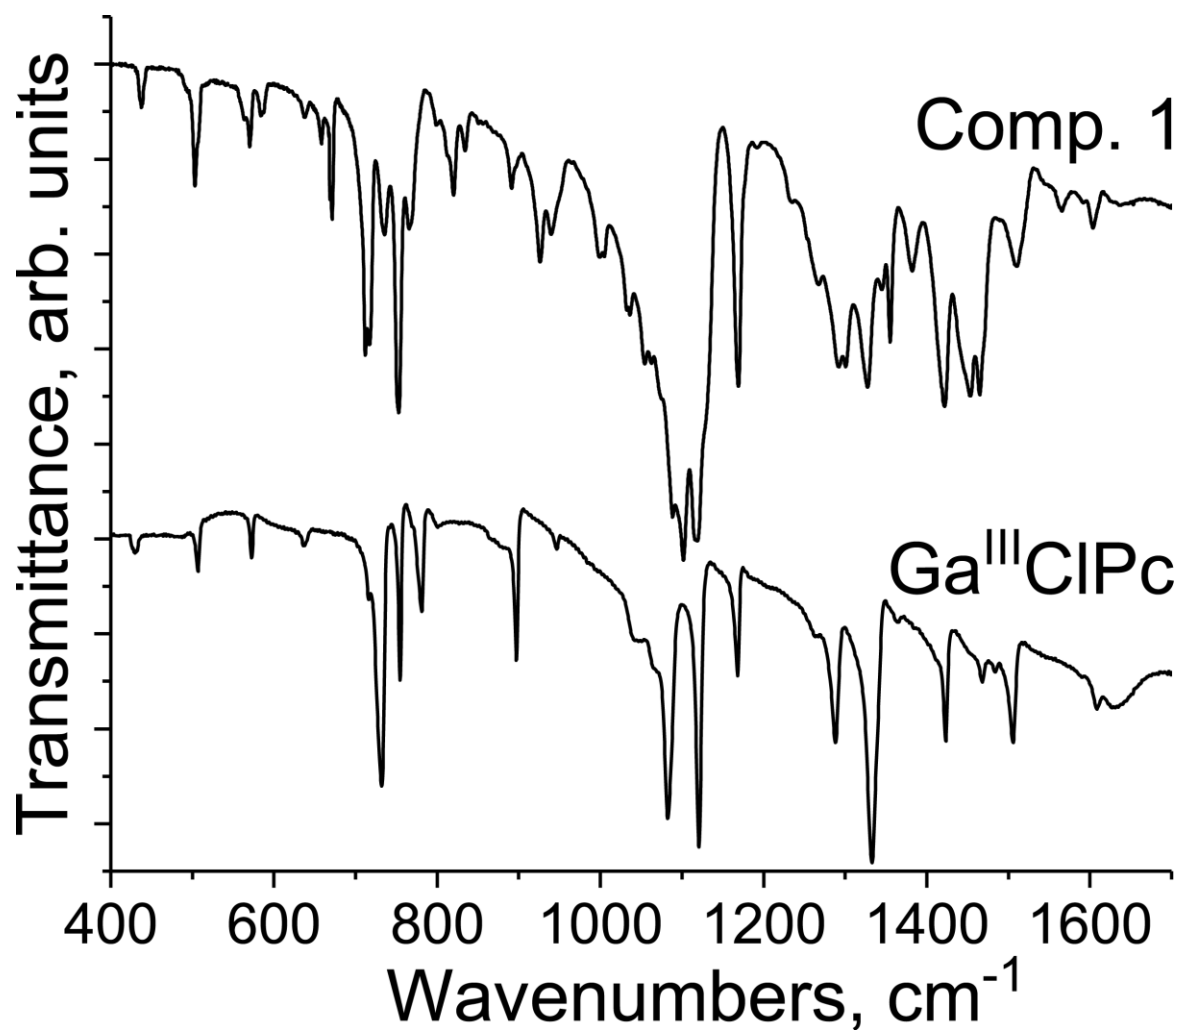

**Figure S1.** IR spectra of pristine gallium(III) chloride phthalocyanine  $\text{Ga}^{\text{III}}\text{Cl}(\text{Pc}^{2-})$  and  $\{\text{crypt}(\text{K}^+)\}\{\text{Ga}^{\text{III}}\text{CN}(\text{Pc}^{\bullet 3-})\}^{\bullet -} \cdot 0.5\text{C}_6\text{H}_4\text{Cl}_2$  (**1**) in KBr pellets. Pellet for **1** was prepared in anaerobic conditions.

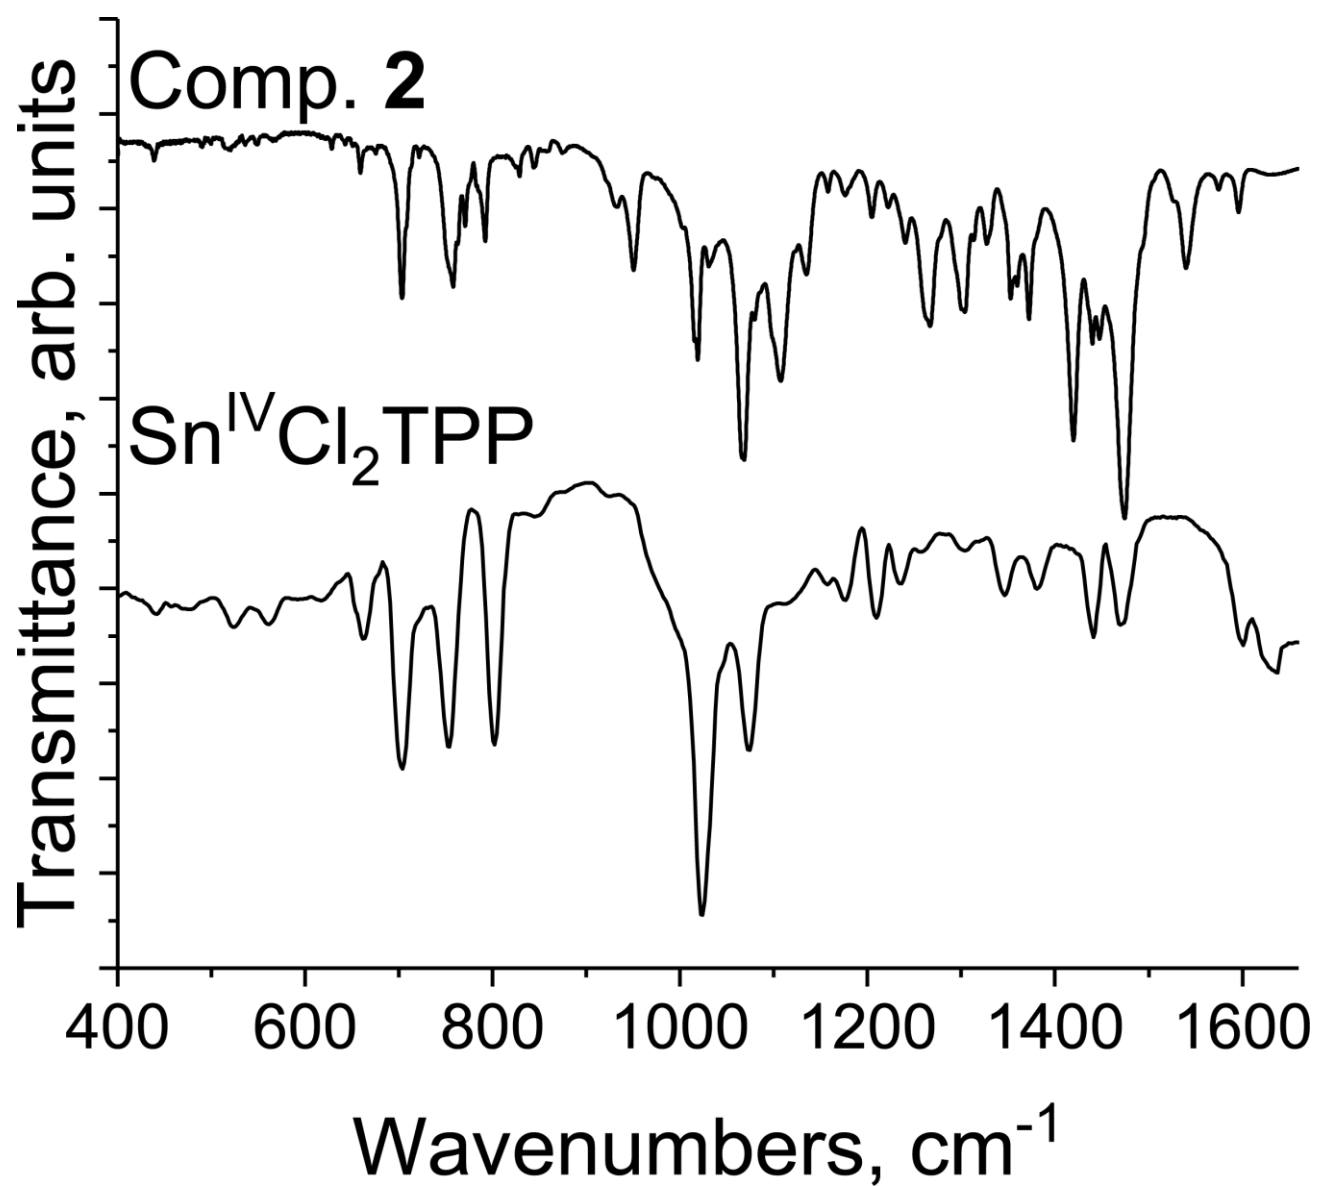

**Figure S2.** IR spectra of pristine  $\text{Sn}^{\text{IV}}\text{Cl}_2(\text{TPP}^{2-})$  and  $\{\text{crypt}(\text{K}^+)\}\{\text{Sn}^{\text{IV}}(\text{CN})_2[\text{TPP}(\text{CN})^3]\}^-$  (**2**) in KBr pellets. Pellet for **2** was prepared in anaerobic conditions.

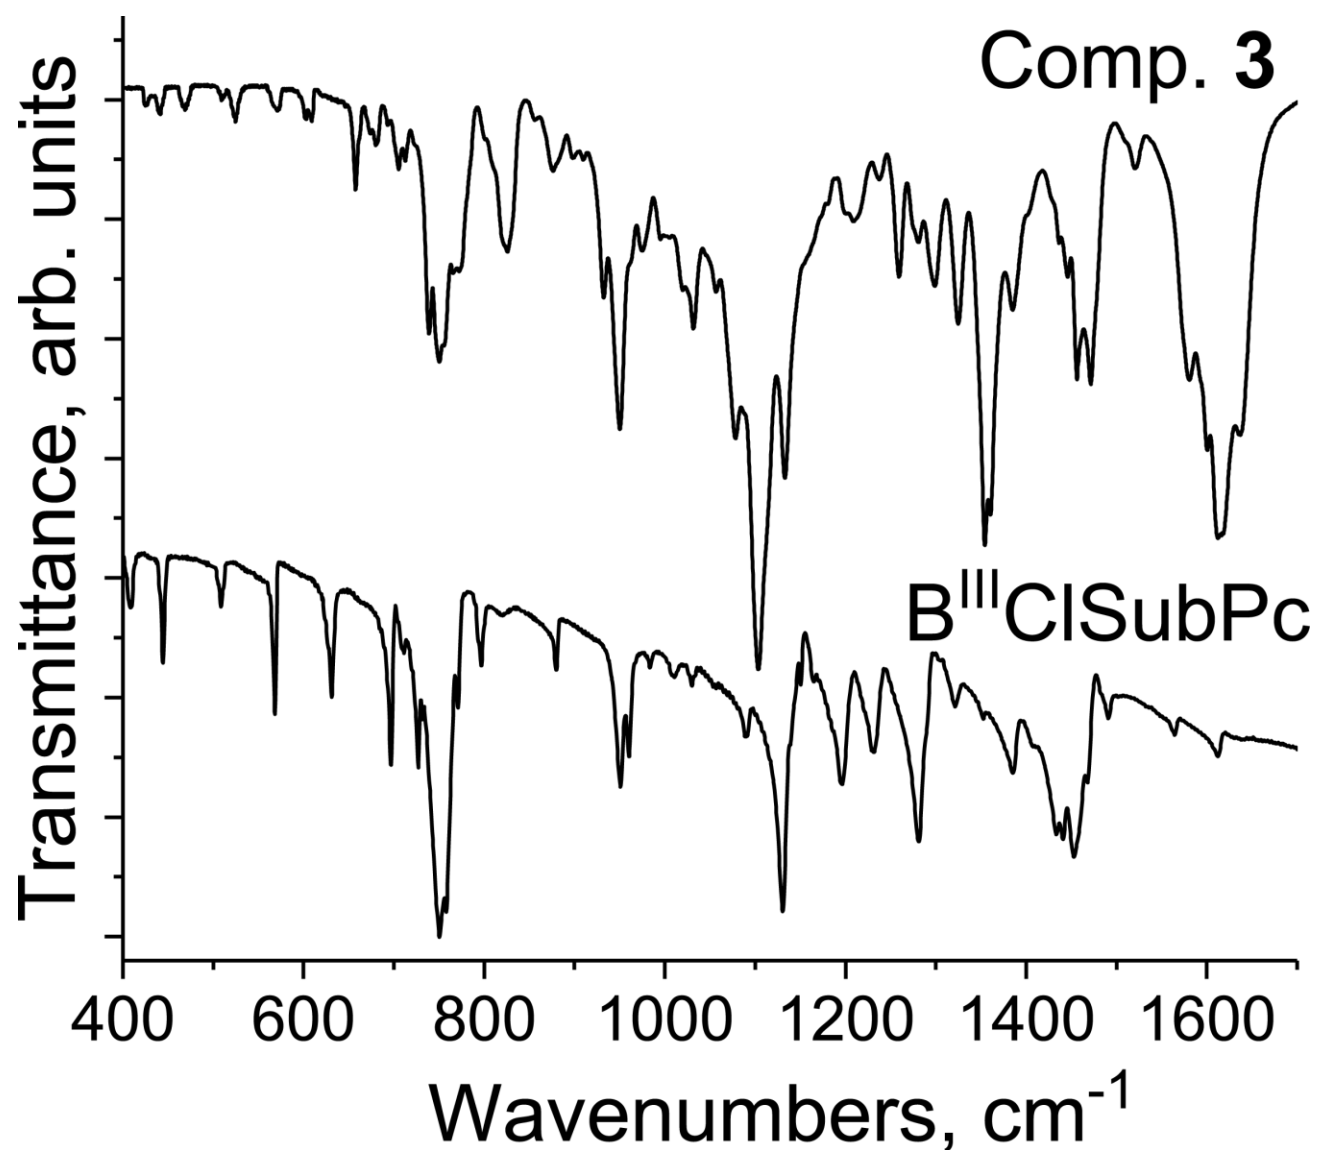

**Figure S3.** IR spectra of pristine  $\text{B}^{\text{III}}\text{Cl}(\text{SubPc}^{2-})$  and  $\{\text{crypt}(\text{K}^+)\}_2[\text{B}^{\text{III}}(\text{CN})\{\text{SubPc}(\text{CN})_2\}]_2^{2-} \cdot 3\text{C}_6\text{H}_4\text{Cl}_2$  (**3**) in KBr pellets. Pellet for **3** was prepared in anaerobic conditions.

## Crystal structures

### Compound 1.

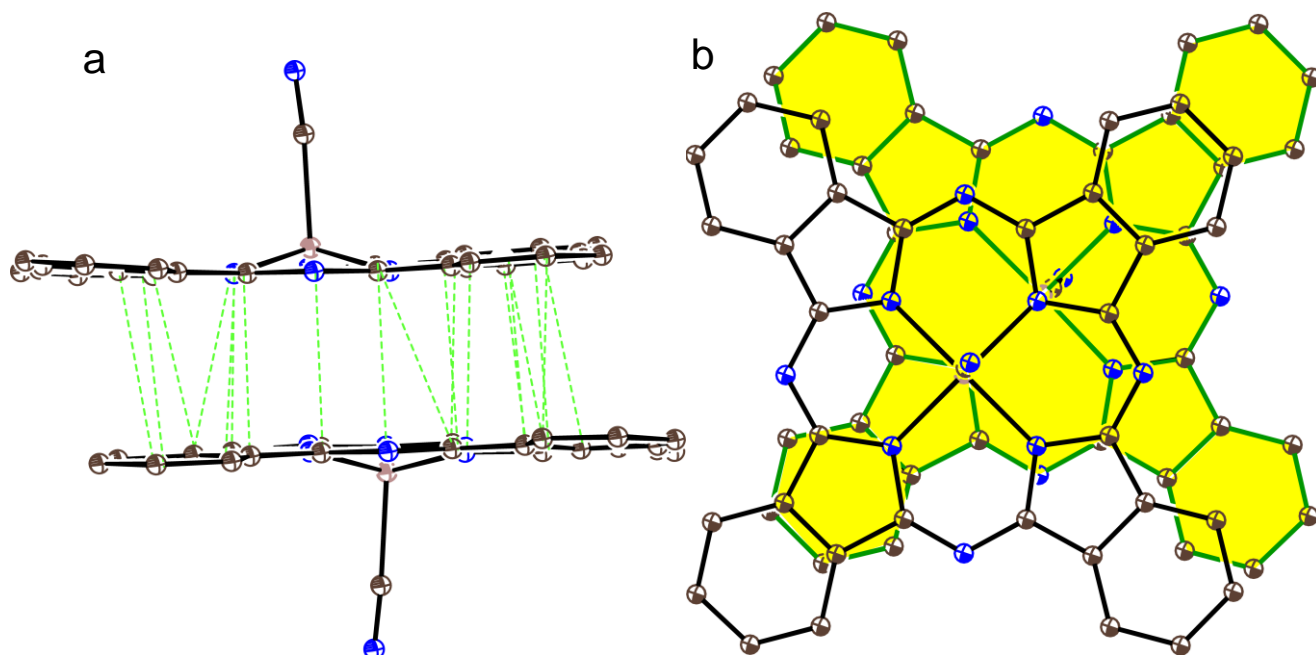

**Fig. S4.** View on (a) and along (b) the  $\pi$ -stacking dimer from the  $[\text{Ga}^{\text{III}}(\text{CN})(\text{Pc}^{\bullet 3-})]^{-}$  radical anions. The most distant radical anion of two ones is shown by green bonds and yellow color. Short van der Waals contacts between the radical anions are shown by green dashed lines.

Compound 3.

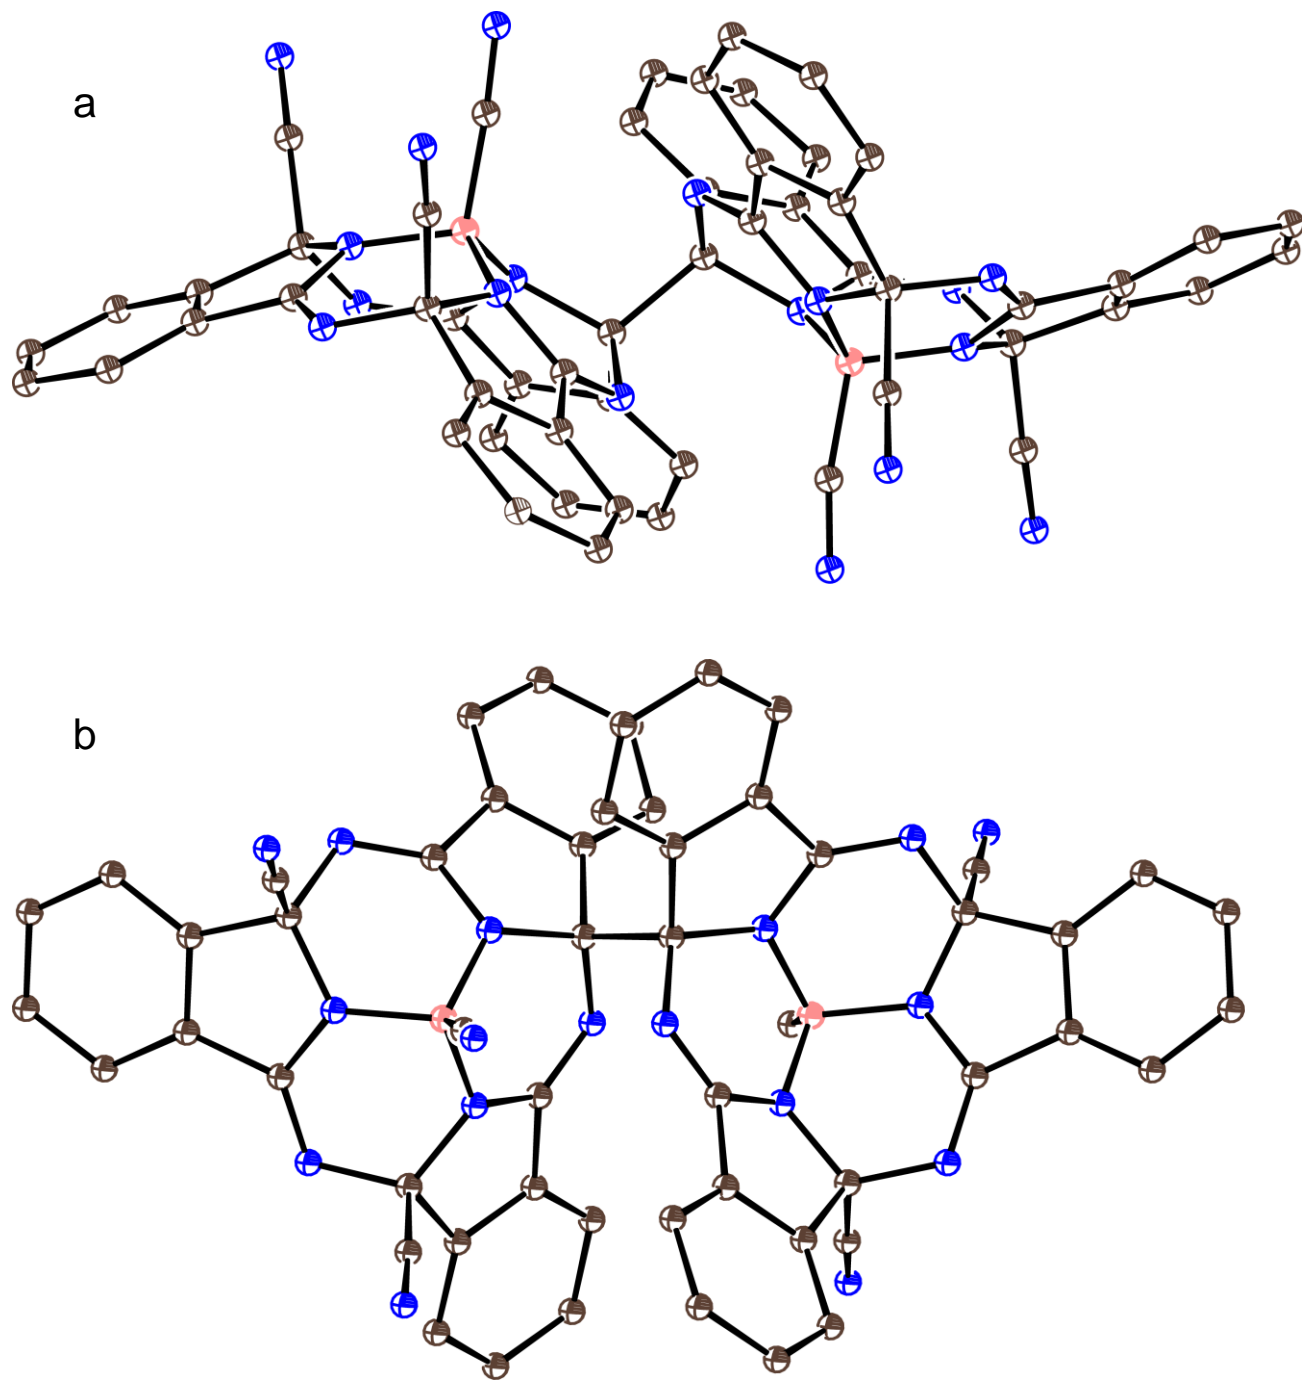

**Fig. S5.** View on the  $\{B^{III}(CN)[SubPc(CN)_2]\}_2^{2-}$  dimer (a and b).

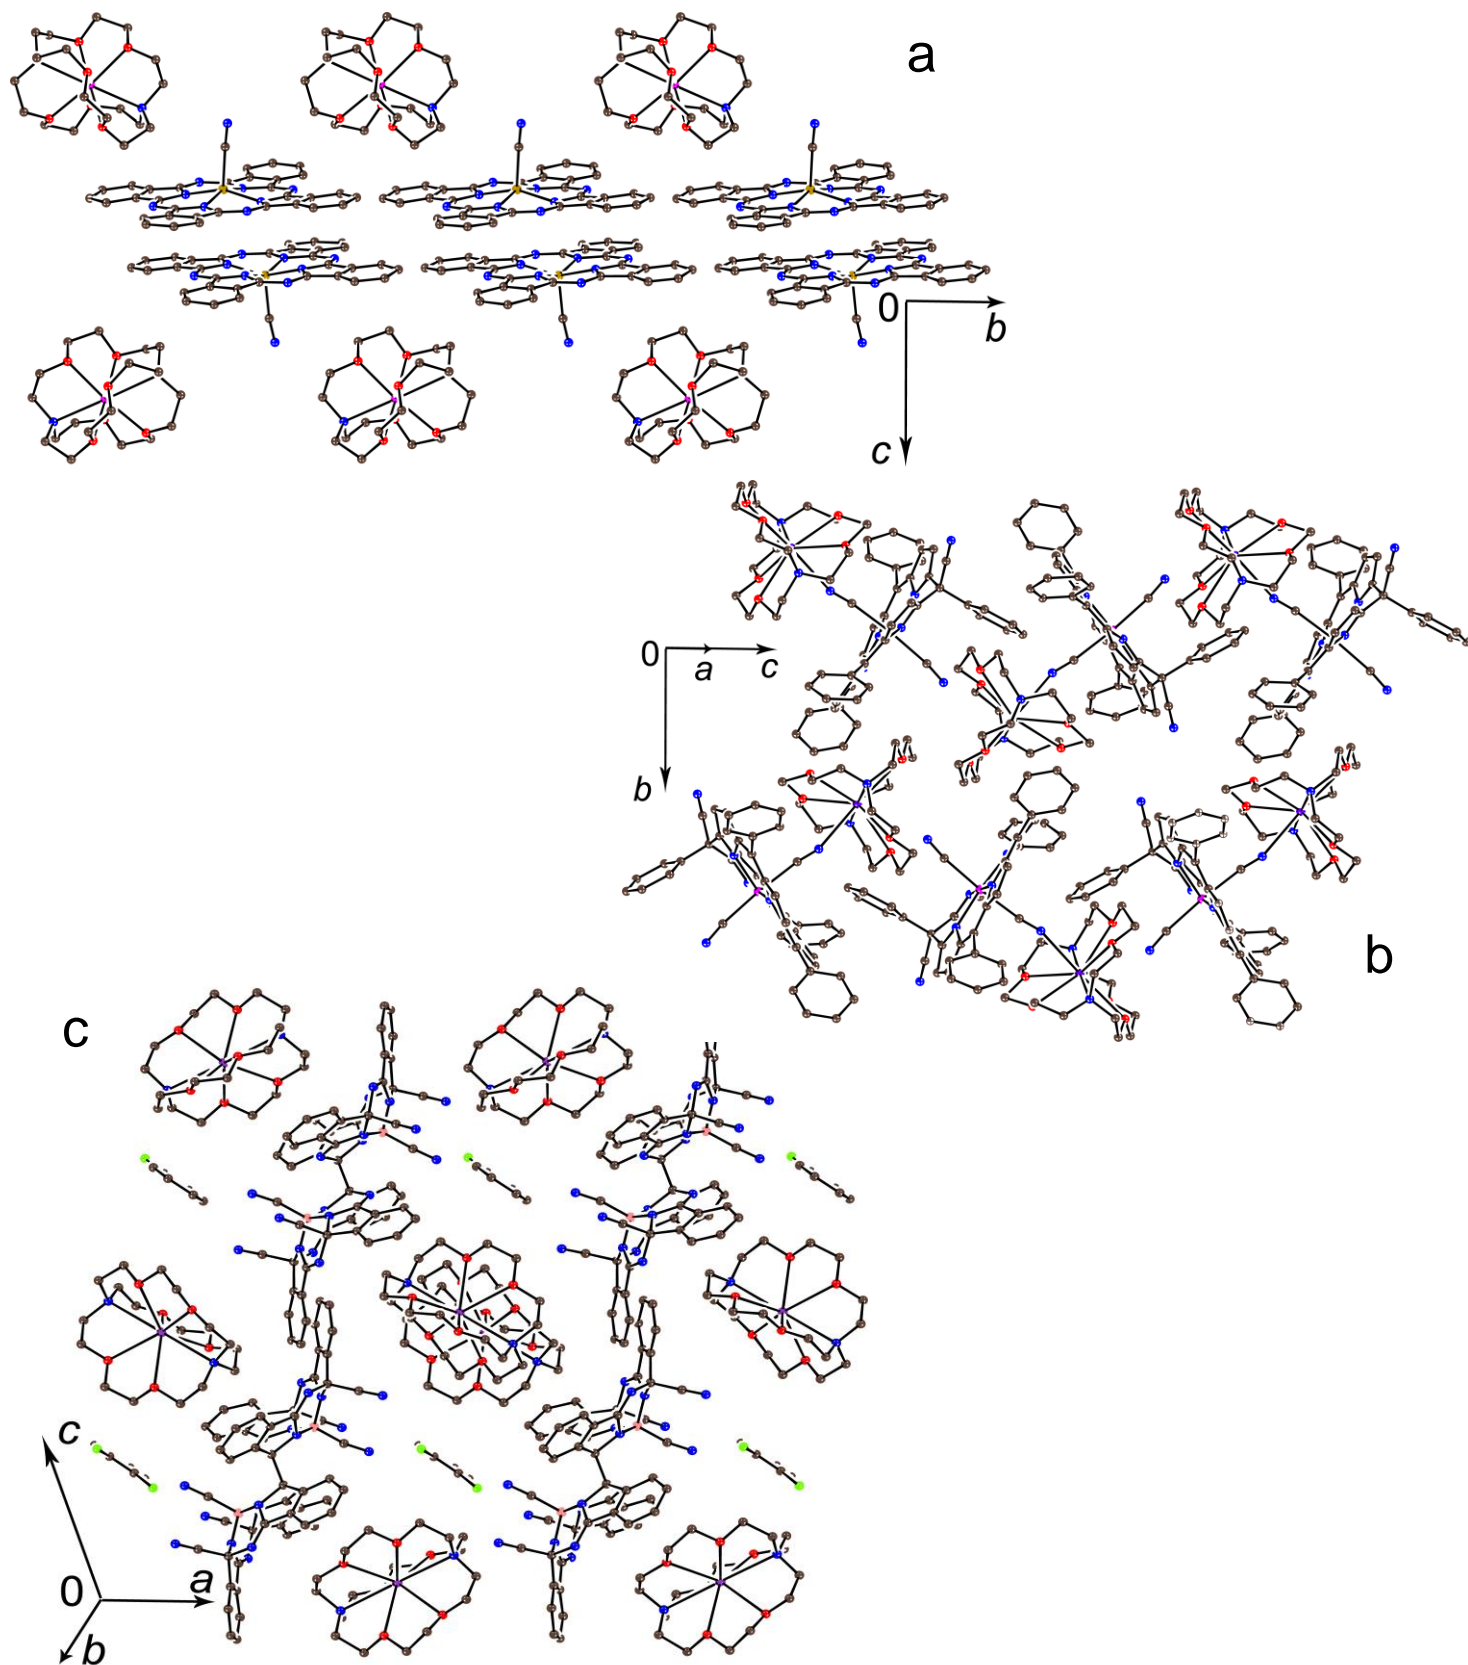

**Fig. S6.** Crystal structure of compounds: **1** (a); **2** (b); and **3** (c).

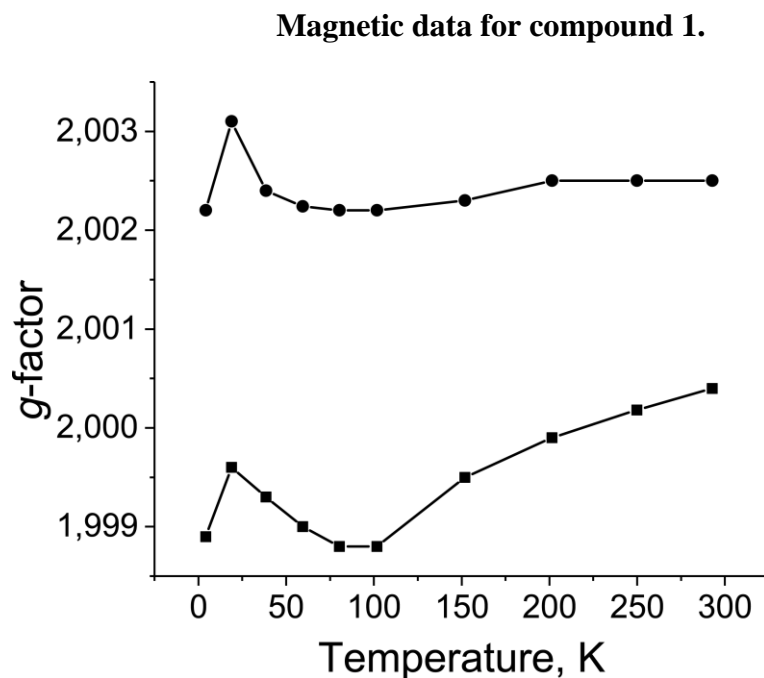

**Fig. S7.** Temperature dependence of  $g$ -factors of two components of EPR signal from polycrystalline **1**.

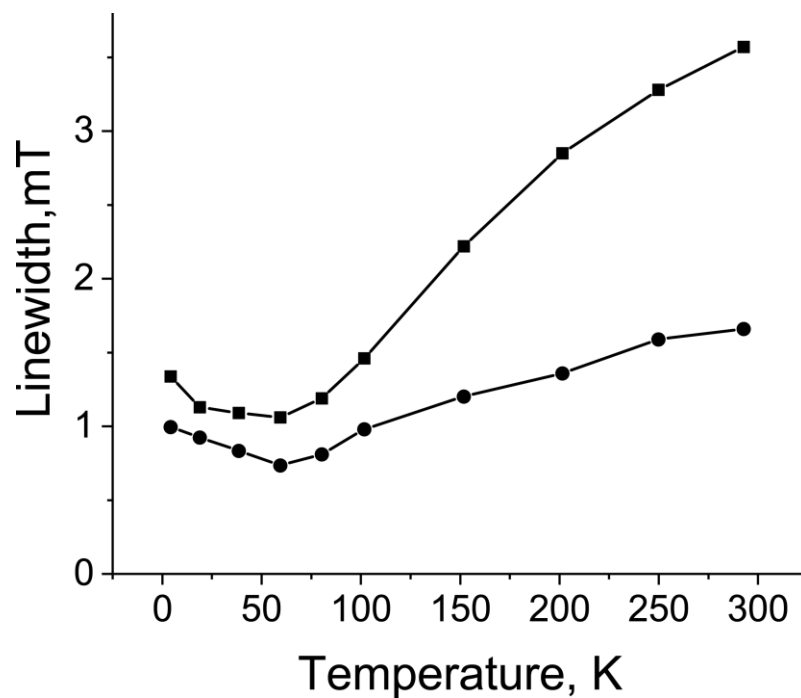

**Fig. S8.** Temperature dependence of linewidth of two components of EPR signal from polycrystalline **1**.

### Theoretical calculations.

DFT calculations were performed using the PBE density functional theory<sup>1</sup> with the extended basis set B, C, N, O, Cl, Sn : [5s5p2d/3s3p2d], Ga [9s9p8d/5s5p4d], K :[4s1p/2s1p], H :[5s1p/3s1p] for the valence electrons and the SBK pseudopotential<sup>2</sup>. All calculations were carried out using the PRIRODA program<sup>3</sup> at Joint Supercomputer Center of the Russian Academy of Sciences.

### Reaction of Ga<sup>III</sup>CIPc with KCN in the presence of cryptand[2.2.2].

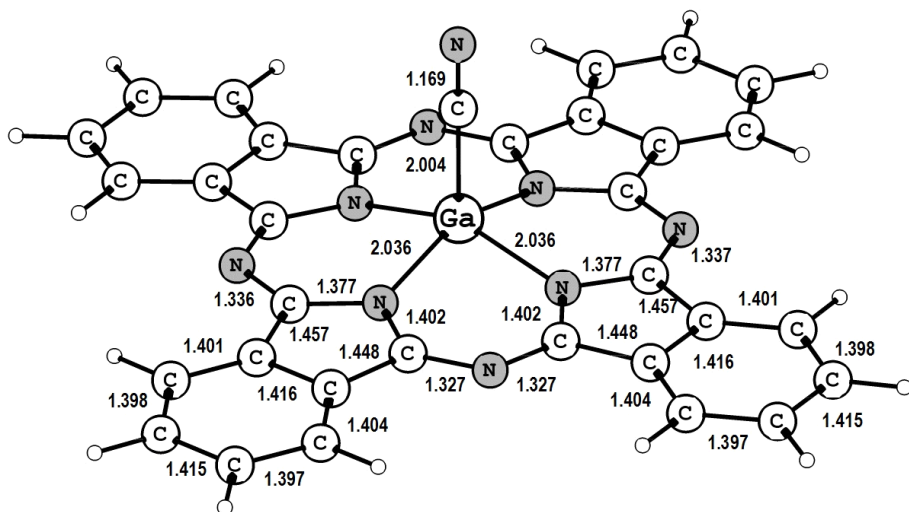

**Fig. S9.** Calculated structure of Ga<sup>III</sup>(CN)(Pc<sup>2-</sup>).

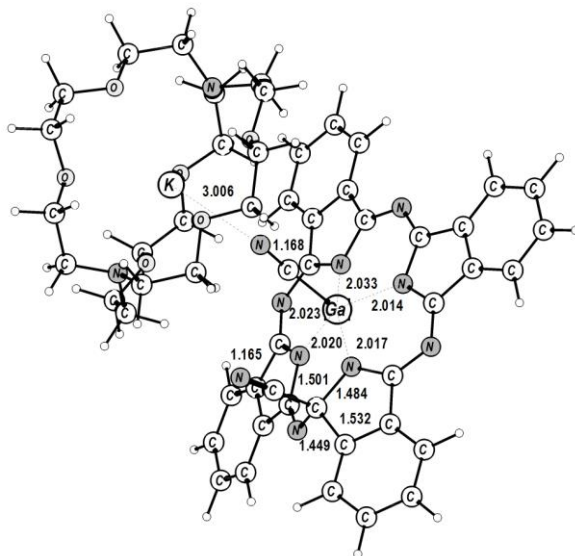

**Fig. S10.** Structure of {crypt(K<sup>+</sup>)}{Ga<sup>III</sup>(CN)[Pc(CN)]<sup>3-</sup>}<sup>-</sup>.

Substitution of  $\text{Cl}^-$  by  $\text{CN}^-$  in  $\text{Ga}^{\text{III}}\text{Cl}(\text{Pc}^{2-})$  gives the energy gain of 5.4 kcal/mol. Complex  $\text{Ga}^{\text{III}}(\text{CN})(\text{Pc}^{2-})$  (Fig. S9) has high electron affinity of 2.6 eV. However, this value is essentially lower than electron affinity of  $\text{CN}^-$  (3.56 eV). Therefore, reduction of  $\text{Ga}^{\text{III}}(\text{CN})\text{Pc}$  by the  $\text{CN}^-$  anion is thermodynamically possible only in the case of the dimerization of CN.

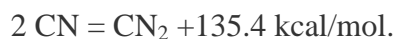

Cyanide-anion can add to the carbon atom closest to *meso*-nitrogen atom of the  $\text{Pc}^{2-}$  macrocycle with the energy gain of 37.1 kcal/mol, and the  $\{\text{Ga}^{\text{III}}(\text{CN})[\text{Pc}(\text{CN})]^{3-}\}^-$  anions are formed (Fig S10). This gain decreases to 16.3 kcal/mol when calculations were carried out together with the  $\text{crypt}(\text{K}^+)$  counter cation. Addition of second  $\text{CN}^-$  to  $\{\text{Ga}^{\text{III}}(\text{CN})[\text{Pc}(\text{CN})]^{3-}\}^-$  is thermodynamically forbidden since in this case the energy loss is 45.3 kcal/mol.

Energy of the C-CN bond cleavage in  $\{\text{Ga}^{\text{III}}(\text{CN})[\text{Pc}(\text{CN})]^{3-}\}^-$  derived from the calculations is 62.5 kcal/mol and 58.4 kcal/mol when calculations were carried out with or without the counter cation, respectively. Therefore, the  $\{\text{Ga}^{\text{III}}(\text{CN})[\text{Pc}(\text{CN})]^{3-}\}^-$  anion is metastable towards the CN cleavage and their following dimerization:

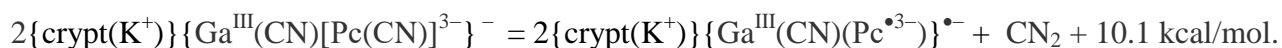

However, this bimolecular reaction cannot occur due to strong shielding of the reaction centers – carbon atoms of the CN substituents.

It should be noted that  $\text{CN}^-$  anions potentially can add to the macrocycle also by nitrogen atom as shown in Fig. S11. In this case energy gain is smaller being only 19.3 kcal/mol. This reaction is almost thermoneutral in the presence of  $\{\text{crypt}(\text{K}^+)\}$  cation:

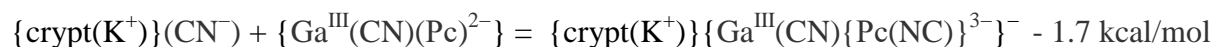

According to the calculations triplet state of this compound is higher in energy by 16.3 kcal/mol than the ground singlet state. The energy of the C-NC bond cleavage in this compound is 44.2 and 40.6 kcal/mol according to the calculations with or without the counter cation, respectively. However, in this case the reaction centers – carbon atoms of the CN substituents become unshielded.

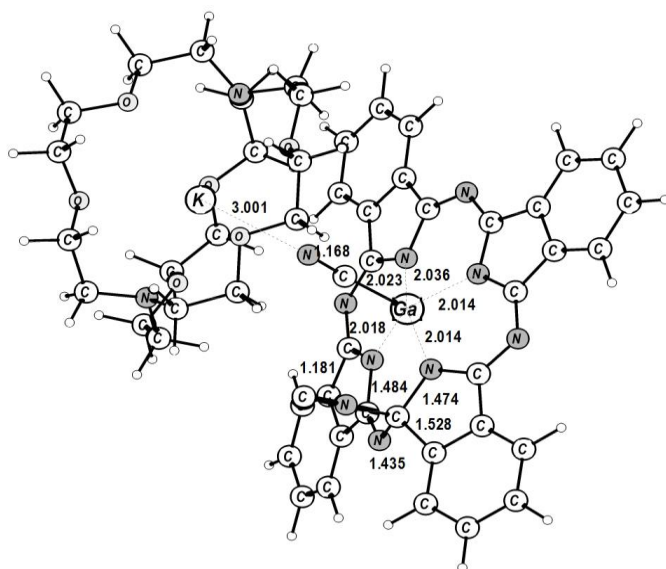

**Fig. S11.** Structure of  $\{\text{crypt}(\text{K}^+)\}\{\text{Ga}^{\text{III}}(\text{CN})[\text{Pc}(\text{NC})]^{3-}\}^-$ .

In this case bimolecular reaction accompanied by the C-NC bond cleavage, the formation of  $\text{Pc}^{\bullet 3-}$  and dimerization of CN occurs with essential energy gain.

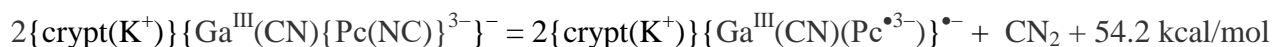

Considering the ionic  $\{\text{crypt}(\text{K}^+)\}(\text{CN}^-)$  pairs in Fig. S12, it is seen that the K-C and K-N distances are close. Configuration with the K-C(N)-N(C) angle =  $180^\circ$  is a transition state for the rotation of  $\text{CN}^-$  in the ionic pair and the energy of this state is higher by several kcal/mol relative to the basic structure shown in Fig. S12. The C and N atoms of  $\text{CN}^-$  are unshielded in the transition state and obviously less shielded in comparison with the terminal C or N atoms of the cyano-group linked to the macrocycle in  $\{\text{Ga}^{\text{III}}(\text{CN})\{\text{Pc}(\text{NC or CN})\}^{3-}\}^-$ . As a result, the reaction of cleavage of

the C-CN bond by the  $\text{CN}^-$  anion in the ionic pair is sterically less hindered in comparison with the direct interaction of two  $\{\text{Ga}^{\text{III}}(\text{CN})\{\text{Pc}(\text{NC})\}^{3-}\}^-$  anions.

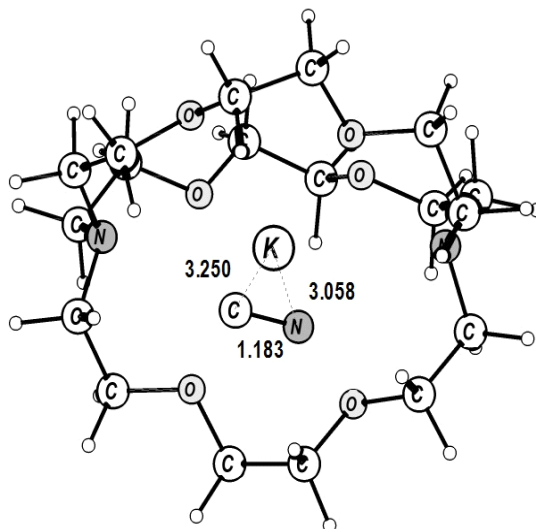

**Fig. S12.** Calculated structure of the ionic  $\{\text{crypt}(\text{K}^+)\}(\text{CN}^-)$  pair.

As a result, reduction of the macrocycle can occur after the C-CN bond cleavage by  $\text{CN}^-$  in the following reactions:

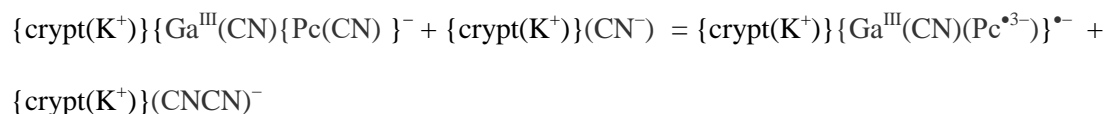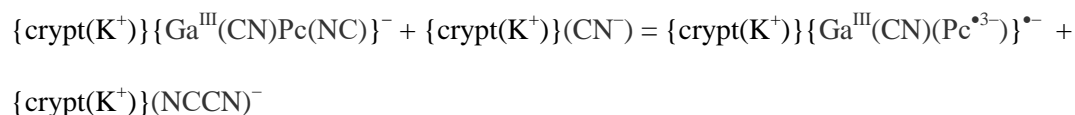

Taking into account the reactions:

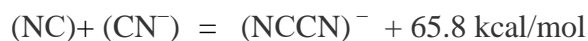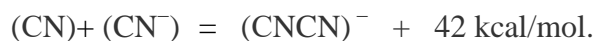

it can be concluded that the  $\{\text{Ga}^{\text{III}}(\text{CN})[\text{Pc}(\text{NC})]^{3-}\}^-$  or  $\{\text{Ga}^{\text{III}}(\text{CN})[\text{Pc}(\text{CN})]^{3-}\}^-$  anions can eliminate the CN group in the presence of third equivalent of  $\{\text{crypt}(\text{K}^+)\}(\text{CN}^-)$  independently on type of the

initial addition of  $\text{CN}^-$  to the macrocycle. Both routes of the  $\text{CN}^-$  addition yield the same reduction product  $\{\text{crypt}(\text{K}^+)\}\{\text{Ga}^{\text{III}}(\text{CN})(\text{Pc}^{\bullet 3-})\}^{\bullet -}$  but probably different side products (shown in Fig. S13).

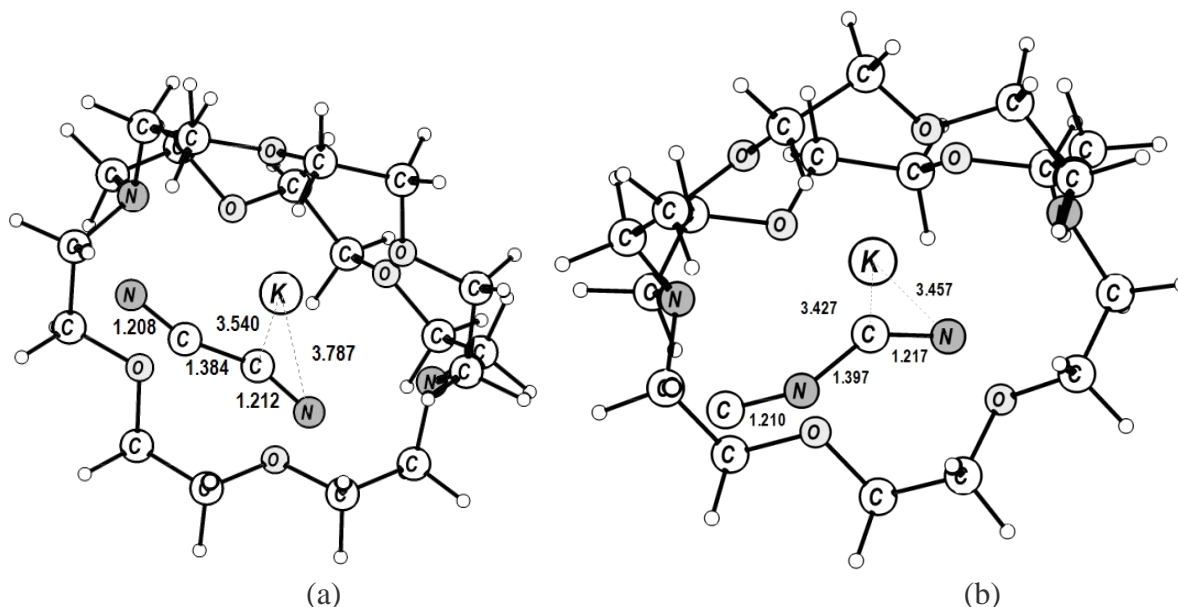

**Fig. S13.** Structure of ionic pairs  $\{\text{crypt}(\text{K}^+)\}(\text{NCCN})^-$  (a) and  $\{\text{crypt}(\text{K}^+)\}(\text{NCNC})^-$  (b).

### The formation of dimeric complex at cyanation of $\text{B}^{\text{III}}\text{Cl}(\text{SubPc})$ .

Dissolution of  $\text{KCN}$  in *o*-dichlorobenzene in the presence of cryptand[2.2.2] yields soluble ionic  $\{\text{crypt}(\text{K}^+)\}(\text{CN}^-)$  pairs. Calculated energy of the  $\text{CN}^-$  bonding in these pairs is 79.4 kcal/mol.

Substitution of  $\text{Cl}^-$  at the boron(III) atom of  $\text{B}^{\text{III}}\text{Cl}(\text{SubPc}^{2-})$  by  $\text{CN}^-$  is a thermodynamically favorable reaction:

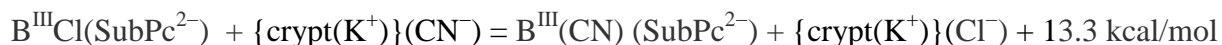

The addition of first  $\text{CN}^-$  to  $\text{B}^{\text{III}}(\text{CN})(\text{SubPc}^{2-})$  yields the  $[\text{B}^{\text{III}}(\text{CN})\{\text{SubPc}(\text{CN})\}]^{3-}$  anion with the large energy gain of 39.5 kcal/mol. On the contrary, the energy loss is 32.5 kcal/mol at the addition of second  $\text{CN}^-$  and the formation of the  $[\text{B}^{\text{III}}(\text{CN})\{\text{SubPc}(\text{CN})_2\}]^{4-}$  dianions. These dianions are strong electron donors since elimination of one electron from them gives the energy gain of 0.7 eV.

As a result, addition of two cyanide anions with simultaneous elimination of one electron provides rather large energy gain of 22.9 kcal/mol in total providing the formation of the  $[B^{III}(CN)\{SubPc(CN)_2\}^{\bullet 3-}]^{\bullet -}$  radical anions. However, according to the calculations these radical anions cannot dimerize due to essential Coulomb repulsion between them, and their dimerization is unfavorable (the energy loss at the dimerization is 23.6 kcal/mol).

In contrast to the  $\{Ga^{III}(CN)[Pc(CN)]^{3-}\}^-$  anion, the C-CN bond energy in the  $[B^{III}(CN)\{SubPc(CN)\}^{3-}]^-$  anion is very high being 72.5 kcal/mol, and it cannot be compensated by the dimerization energy of two CN radicals. In the  $[B^{III}(CN)\{SubPc(CN)_2\}^{4-}]^{2-}$  dianion the C-CN bond energy becomes even higher being 74.7 kcal/mol. Thus, there is only one possible way of the dianion transformation, namely, electron transfer to surrounding solvent molecules.

Taking into account the interaction of the obtained anions or dianions with the  $\{crypt(K^+)\}$  counter cations, both  $CN^-$  additions to  $B^{III}(CN)(SubPc^{2-})$  become thermodynamically possible and even second addition of  $CN^-$  becomes almost a thermoneutral reaction:

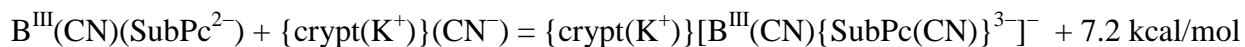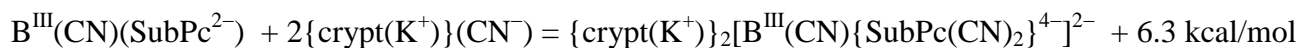

Calculated structures of the salts obtained in these reactions are shown in Fig. S14.

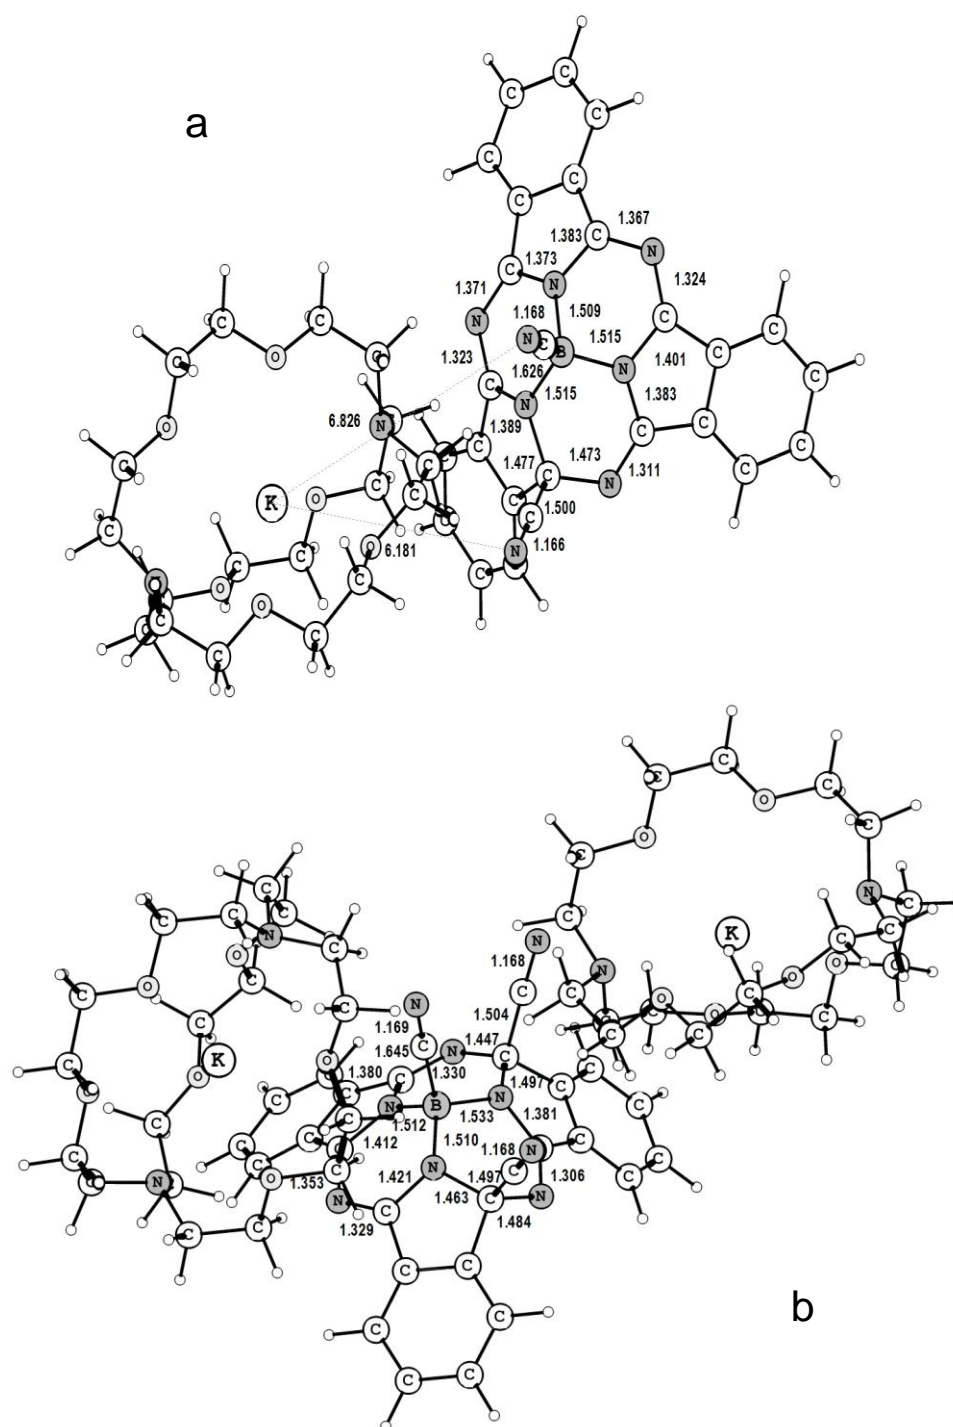

**Fig. S14.** Calculated structures of the anions obtained at single and double addition of  $\{\text{crypt}(\text{K}^+)\}(\text{CN}^-)$  to  $\text{B}^{\text{III}}(\text{CN})(\text{SubPc}^{2-})$  and the formation of  $\{\text{crypt}(\text{K}^+)\}[\text{B}^{\text{III}}(\text{CN})\{\text{SubPc}(\text{CN})\}^3]^-$  (a) and  $\{\text{crypt}(\text{K}^+)\}_2[\text{B}^{\text{III}}(\text{CN})\{\text{SubPc}(\text{CN})_2\}^4]^{2-}$  (b).

Dimerization in the presence of the {crypt(K<sup>+</sup>)} counter cations which neutralize the effects of Coulomb repulsion also becomes energetically favorable.

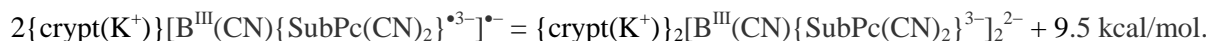

Structure of the dimeric product shown in Fig. S15 is close to the experimental structure of the [B<sup>III</sup>(CN){SubPc(CN)<sub>2</sub>}<sup>3-</sup>]<sub>2</sub><sup>2-</sup> dianion. Fig. S16 shows the structure of this dianion whose geometry was optimized without counter cations. It is seen that the structure with or without the counter cations has close geometry indicating a weak effect of counter cations on their geometry.

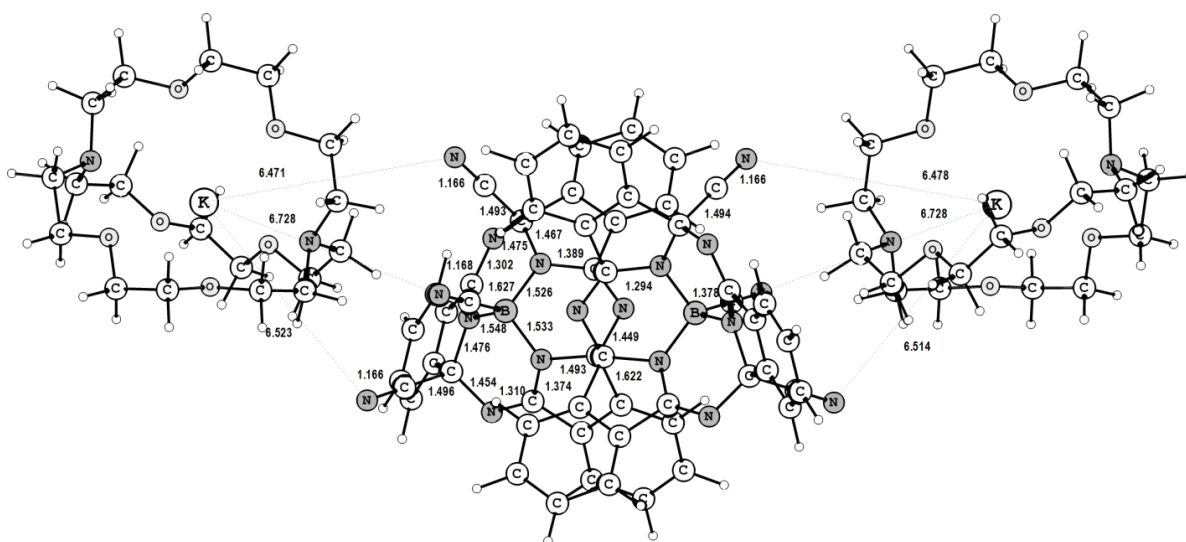

**Fig. S15.** Calculated structure of {crypt(K<sup>+</sup>)}<sub>2</sub>[B<sup>III</sup>(CN){SubPc(CN)<sub>2</sub>}<sup>3-</sup>]<sub>2</sub><sup>2-</sup>.

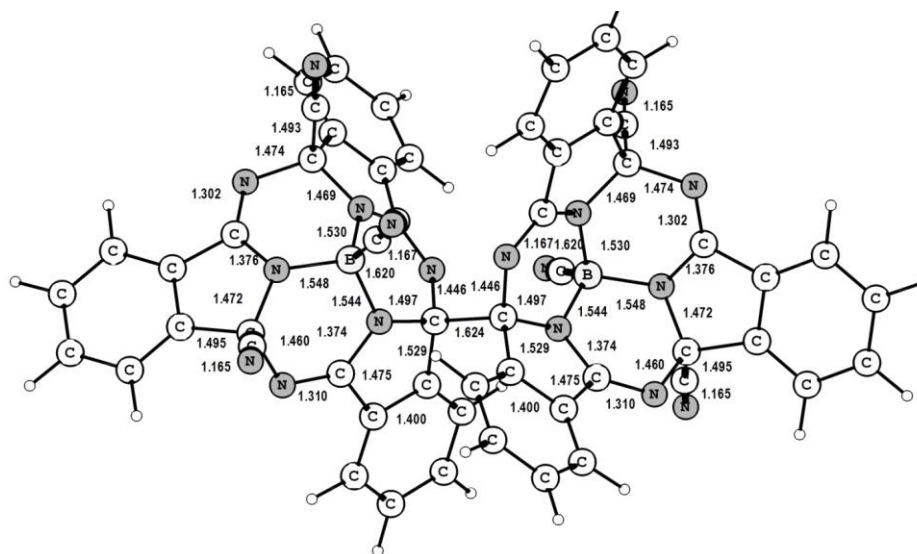

**Fig. S16.** Structure of the [B<sup>III</sup>(CN){SubPc(CN)<sub>2</sub>}<sup>3-</sup>]<sub>2</sub><sup>2-</sup> dianion optimized without counter cations.

The  $[B^{III}(CN)\{SubPc(CN)_2\}^{4-}]^{2-}$  dianion is a strong donor of electron and we suppose that solvent *o*-dichlorobenzene molecules ( $C_6H_4Cl_2$ ) accept an electron from these dianions. The  $(C_6H_4Cl_2)^{\bullet-}$  anions formed at such electron transfer have high interaction energy (71.7 kcal/mol) with the counter cations in ionic pairs (Fig. S17). Pristine  $C_6H_4Cl_2$  has two equal C-Cl bonds of about 2.089 Å length. However, the C-Cl bonds have different length in the reduction product of  $C_6H_4Cl_2$  (Fig. S17a). Interaction with the counter cation leads to decrease of C-Cl dissociation energy from 13.4 to 5.3 kcal/mol. Addition of the  $C_6H_4Cl^{\bullet}$  radical to the solvent  $C_6H_4Cl_2$  molecule is more favorable to the chlorinated carbon atom of  $C_6H_4Cl_2$ , (Fig. S17b) giving the energy gain of 27.2 kcal/mol. Finally, this way leads to the formation of corresponding dichlorobiphenyl.

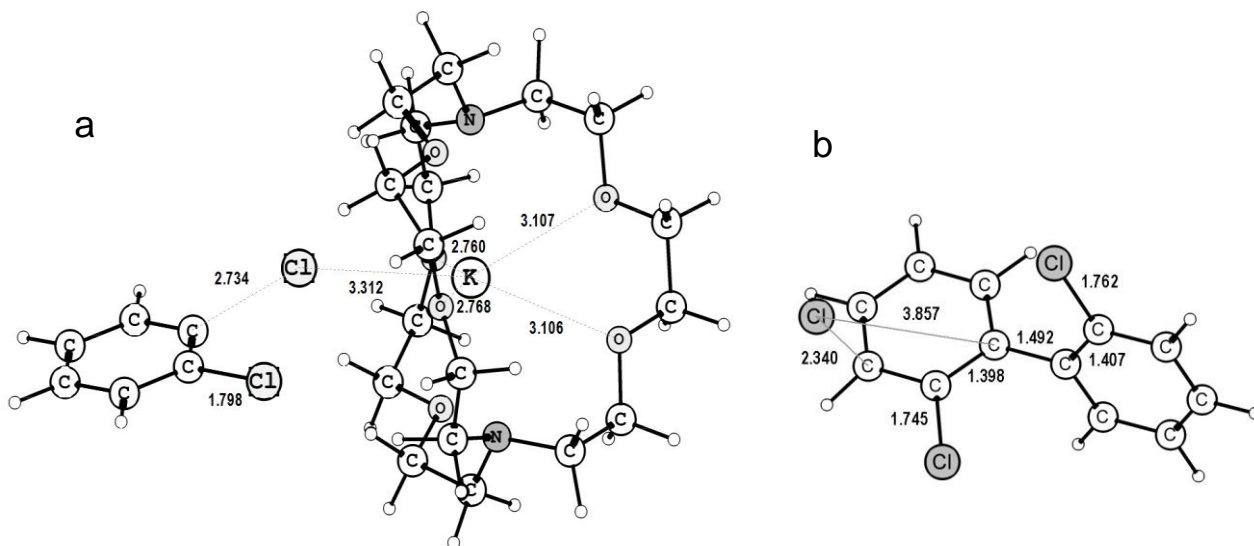

**Fig. S17.** (a) Structure of the ionic  $\{crypt(K^+)\}(C_6H_4Cl_2)^-$  pair; (b) structure of the product of  $C_6H_4Cl^{\bullet}$  addition to  $C_6H_4Cl_2$ .

As we discussed above, addition of two  $CN^-$  with simultaneous elimination of one electron from the formed dianion provides large energy gain even excluding the effect of counter cation. Energy gain of this reaction can be even increased when the effect of counter cations is taken into account. Electron transfer from  $[B^{III}(CN)\{SubPc(CN)_2\}^{4-}]^{2-}$  to  $C_6H_4Cl_2$  requires rather small energy loss of

only 9.4 kcal/mol. Taking into account essential energy gains at the dimerization of  $\text{C}_6\text{H}_4\text{Cl}_2^-$  and the  $[\text{B}^{\text{III}}(\text{CN})\{\text{SubPc}(\text{CN})_2\}^{\bullet 3-}]^{\bullet -}$  radical anions, it can be concluded that reaction of the formation of dimeric  $[\text{B}^{\text{III}}(\text{CN})\{\text{SubPc}(\text{CN})_2\}^{\bullet 3-}]_2^{2-}$  bonded by a single C-C bond is very favorable and it becomes irreversible proceeding with large energy release.

**Reaction of  $\{\text{Sn}^{\text{IV}}(\text{CN})_2[\text{TPP}^{2-}]\}$  with KCN in the presence of cryptand[2.2.2].**

$\{\text{Sn}^{\text{IV}}(\text{CN})_2[\text{TPP}]^{2-}\}$  porphyrin (Fig. S18) has high electron affinity of 2.3 eV. Addition of  $\text{CN}^-$  to *meso*-position of this porphyrin gives energy gain of 41.3 kcal/mol. Addition of the second  $\text{CN}^-$  anion leads to the formation of metastable system with the energy increase by 31.7 kcal/mol. Detachment of  $\text{CN}^-$  from the  $\{\text{crypt}(\text{K}^+)\}(\text{CN}^-)$  pair is also thermodynamically favorable in the presence of counter cation:

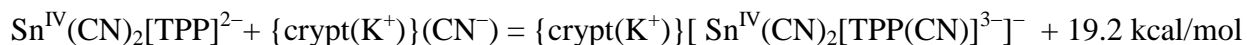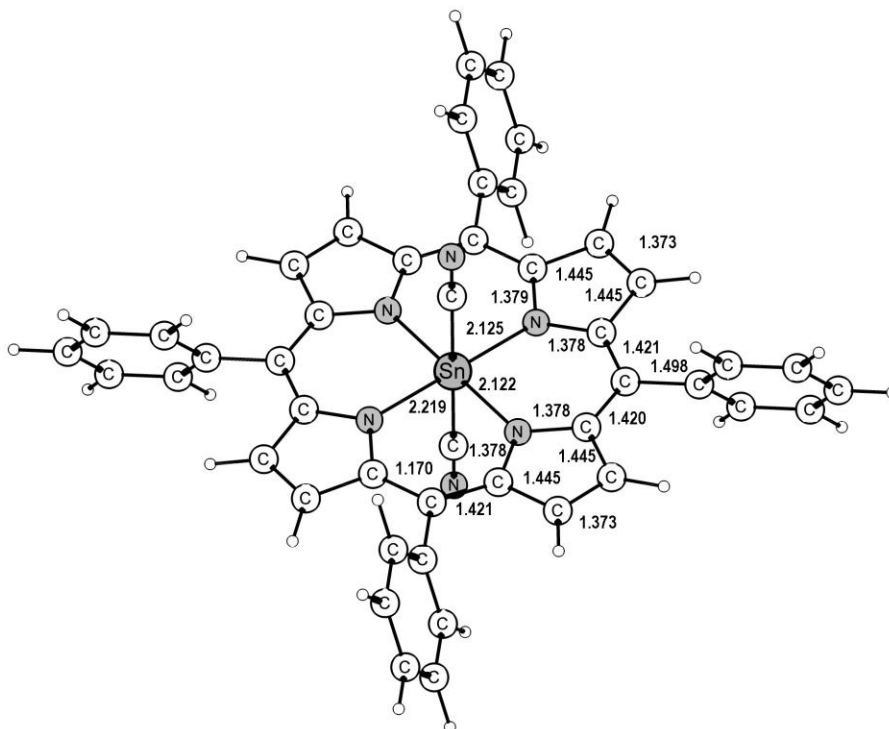

**Fig. S18.** Structure of  $\{\text{Sn}^{\text{IV}}(\text{CN})_2[\text{TPP}]^{2-}\}$ .

The structure of the product is shown in Fig 19. Similarly to boron(III) subphthalocyanine,  $\text{Sn}^{\text{IV}}(\text{CN})_2[\text{TPP}(\text{CN})]^{3-}]^-$  has high energy of 69.6 kcal/mol for the elimination of CN radical which cannot be compensated by the dimerization energy of two CN radicals.  $\{\text{Sn}^{\text{IV}}(\text{CN})_2[\text{TPP}(\text{CN})]^{3-}\}^-$  has the singlet ground state with a singlet-triplet gap of 14 kcal/mol.

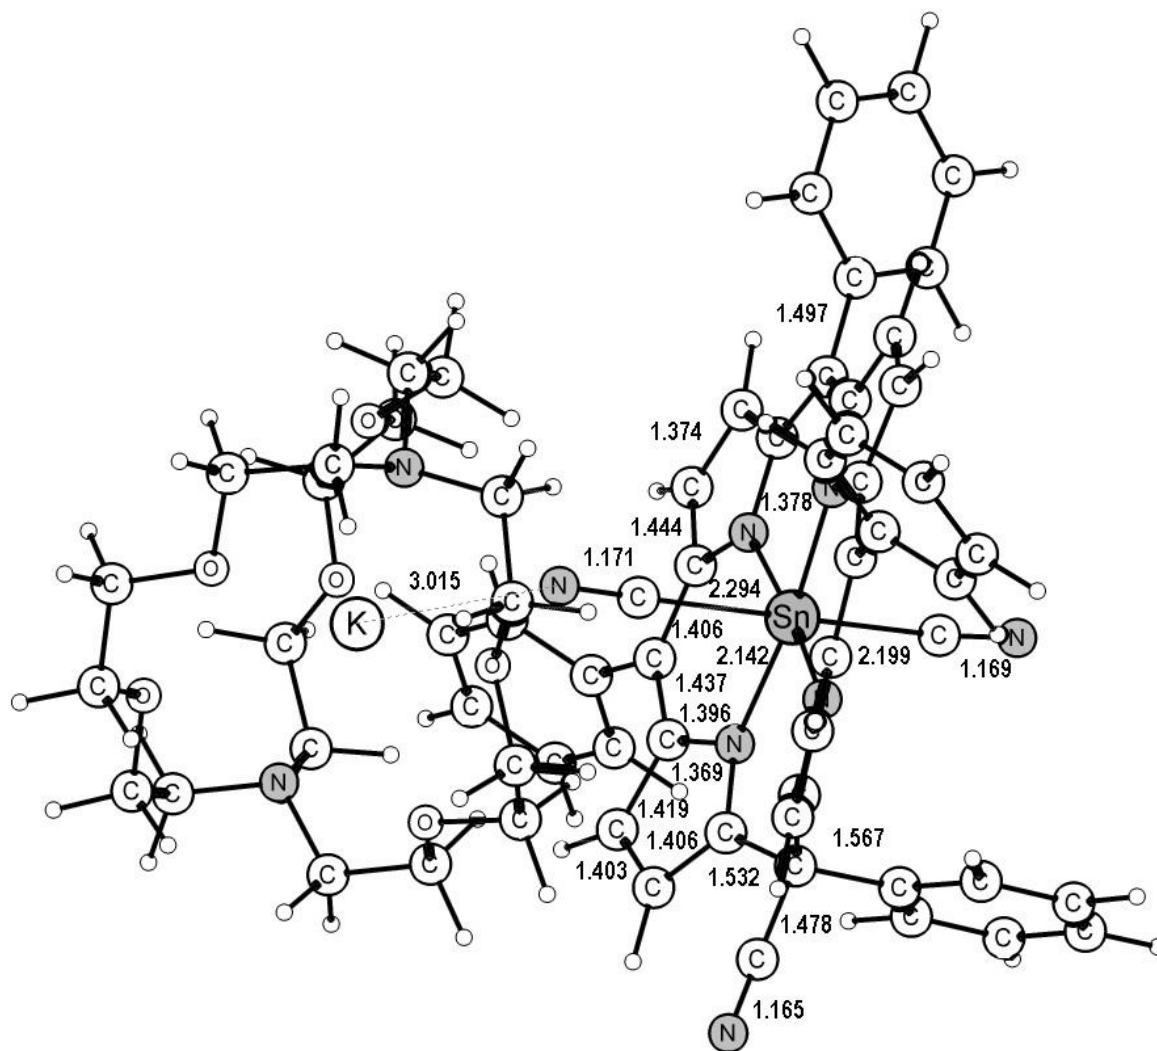

**Fig. S19.** Structure of  $\{\text{crypt}(\text{K}^+)\}\{\text{Sn}^{\text{IV}}(\text{CN})_2[\text{TPP}(\text{CN})]^{3-}\}^-$ .

## References

1. J. P. Perdew K. Burke and M. Ernzerhof, *Phys. Rev. Lett.*, 1996, **77**, 3865.
2. W. J. Stevens, H. Basch, M. Krauss *J. Chem. Phys.* 1984, **81**, 6026.
3. D. N. Laikov, *Chem. Phys. Lett.* 1997, **281**, 151.
